## COMMENTARY

# Plakoglobin and $\beta$ -catenin: protein interactions, regulation and biological roles

Jacob Zhurinsky, Michael Shtutman and Avri Ben-Ze'ev\*

Department of Molecular Cell Biology, The Weizmann Institute of Science, Rehovot, 76100, Israel

\*Author for correspondence (e-mail: avri.ben-zeev@weizmann.ac.il)

Published on WWW 22 August

## SUMMARY

$\beta$ -Catenin can play different roles in the cell, including one as a structural protein at cell-cell adherens junctions and another as a transcriptional activator mediating Wnt signal transduction. Plakoglobin ( $\gamma$ -catenin), a close homolog of  $\beta$ -catenin, shares with  $\beta$ -catenin common protein partners and can fulfill some of the same functions. The complexing of catenins with various protein partners is regulated by phosphorylation and by intramolecular interactions. The competition between different catenin partners for binding to catenins mediates the cross-talk between cadherin-based adhesion, catenin-dependent transcription

and Wnt signaling. Although plakoglobin differs from  $\beta$ -catenin in its functions and is unable to compensate for defects in Wnt signaling resulting from lack of  $\beta$ -catenin, recent evidence suggests that plakoglobin plays a unique role in Wnt signaling that is different from that of  $\beta$ -catenin. The functional difference between catenins is reflected in their differential involvement in embryonic development and cancer progression.

Key words:  $\beta$ -Catenin, Plakoglobin, Transactivation, Cell adhesion, Signal transduction

## INTRODUCTION

A major lesson we have learned from gene knockout studies in mice is that the functions of many proteins significantly overlap, which enables the organism to carry out many physiological processes when a key component in a biological pathway is genetically eliminated. More recent studies have reported an increasing number of examples representing 'the other side of the coin', namely the multifunctionality characteristic of certain proteins that enables cells to coordinate the regulation of what sometimes appear to be unrelated biochemical processes. In these cases, the same protein participates in several different processes, which often are carried out at different locations in the cell and form an interdependent network of cellular events.

$\beta$ -Catenin provides an intriguing example of such multifunctionality: it combines the features of a major structural protein at cell-cell junctions with those of a transcription factor (Barth et al., 1997; Behrens, 1999; Ben-Ze'ev and Geiger, 1998; Bullions and Levine, 1998; Seidensticker and Behrens, 2000). Whereas the great majority of  $\beta$ -catenin is engaged in a structural role at adherens junctions, linking adhesion receptors of the cadherin family to the actin cytoskeleton (Adams and Nelson, 1998; Yap et al., 1997), the non-junctional  $\beta$ -catenin is rapidly degraded by the ubiquitin-proteasome system (Fig. 1A). Stabilization of cytoplasmic  $\beta$ -catenin by Wnt signaling leads to its nuclear

accumulation, complexing with LEF/TCF transcription factors and transactivation of LEF/TCF target genes (Eastman and Grosschedl, 1999; Nusse, 1999; Roose and Clevers, 1999). This nuclear signaling by  $\beta$ -catenin is involved in the regulation of cell fate during embryonic development (Wodarz and Nusse, 1998), and the aberrant activation of  $\beta$ -catenin-mediated transactivation might contribute to cancer progression by causing increased cell proliferation (Ben-Ze'ev, 1997; Ben-Ze'ev and Geiger, 1998; Morin, 1999; Polakis, 1999).

Plakoglobin (Cowin et al., 1986), also known as  $\gamma$ -catenin (Ozawa et al., 1989), another vertebrate catenin, is highly homologous to  $\beta$ -catenin (Butz et al., 1992; McCrea et al., 1991). Functions of plakoglobin in cell adhesion that are similar to (in adherens junctions) and different from (in desmosomes) those of  $\beta$ -catenin are well established (Cowin and Burke, 1996; Schmidt et al., 1994) (Fig. 1B). In contrast, the participation of plakoglobin in Wnt signaling is still under debate (Karnovsky and Klymkowsky, 1995; Kofron et al., 1997; Miller and Moon, 1997; Simcha et al., 1998). Recent studies, however, indicate that plakoglobin may play a unique role in the Wnt signaling pathway, one that is different from that of  $\beta$ -catenin (Charpentier et al., 2000; Simcha et al., 1996; Zhurinsky et al., 2000).

Here, we compare interactions that these two vertebrate catenins engage in and discuss recent advances in our understanding of the mechanisms regulating these interactions.

We also discuss the functional differences between plakoglobin and  $\beta$ -catenin in development and tumorigenesis.

## CATENIN DEGRADATION AND THE WNT PATHWAY

Although  $\beta$ -catenin mediates cell-cell adhesion in most cell types and tissues, the transcriptional function of  $\beta$ -catenin is constitutively suppressed by the ubiquitin-proteasome-dependent degradation of non-junctional  $\beta$ -catenin (Aberle et al., 1997; Orford et al., 1997; Salomon et al., 1997; Fig. 1A). The targeting of  $\beta$ -catenin to the proteasome is achieved through its phosphorylation by a multiprotein complex consisting of the serine/threonine kinase glycogen synthase kinase 3 $\beta$  (GSK) and the scaffolding proteins adenomatous polyposis coli (APC) and axin (reviewed by Kikuchi, 2000). The phosphoserine motif in the N terminus of  $\beta$ -catenin (Yost et al., 1996) and plakoglobin (Sadot et al., 2000) is recognized by the ubiquitin ligase  $\beta$ -TrCP, which catalyzes the attachment of ubiquitin peptides to the catenin molecules (Hart et al., 1999; Kitagawa et al., 1999; Liu et al., 1999; Sadot et al., 2000; Winston et al., 1999; Fig. 1A).

The ability of this multiprotein complex to trigger  $\beta$ -catenin degradation is regulated by Wnt signaling. The binding of Wnt to its receptor, frizzled, activates the scaffolding protein dishevelled (Noordermeer et al., 1994), which then interacts with axin (Itoh et al., 2000; Kishida et al., 1999; Smalley et al., 1999) and recruits several other proteins, such as GSK-binding protein (GBP/FRAT) and protein phosphatase 2C (Li et al., 1999; Strovel et al., 2000; Fig. 1A). This leads to the disassembly of the complex (Jho et al., 1999; Li et al., 1999; Farr et al., 2000; Salic et al., 2000; Willert et al., 1999), degradation of axin (Yamamoto et al., 1999) and the accumulation of  $\beta$ -catenin in the cytoplasm and the nucleus. In the nucleus,  $\beta$ -catenin interacts with LEF/TCF transcription factors (Behrens et al., 1996; Brunner et al., 1997; Huber et al., 1996; Molenaar et al., 1996; Riese et al., 1997; van de Wetering et al., 1997) and activates  $\beta$ -catenin:LEF/TCF dependent transcription by providing the transactivation domain to the LEF/TCF complex (van de Wetering et al., 1997). Thus, activation of the Wnt signaling cascade results in  $\beta$ -catenin:LEF/TCF target gene expression.

An additional, APC- and axin-independent pathway might also regulate  $\beta$ -catenin degradation, given that  $\beta$ -catenin (Murray et al., 1998; Zhang et al., 1998) and GSK (Takashima et al., 1998) associate with presenilin. The role of presenilin in  $\beta$ -catenin degradation is still controversial, because presenilin could either stabilize (Zhang et al., 1998) or destabilize (Kang et al., 1999)  $\beta$ -catenin. The relative contributions of the presenilin and axin pathways to  $\beta$ -catenin stability, and the mechanism underlying presenilin-dependent degradation of  $\beta$ -catenin, are incompletely understood.

Plakoglobin, similarly to  $\beta$ -catenin, can bind to LEF/TCF factors (Hecht et al., 1999; Huber et al., 1996; Simcha et al., 1998; Zhurinsky et al., 2000), contains a transactivation domain in its C terminus (Hecht et al., 1999; Simcha et al., 1998) and is targeted for proteasomal degradation by the axin-APC complex (Kodama et al., 1999; Sadot et al., 2000; Fig. 1B). Although in certain cell types overexpression of Wnt results in the accumulation of plakoglobin (Bradley et al., 1993; Papkoff et al., 1996), the involvement of plakoglobin in

**Fig. 1.** The various interactions involving  $\beta$ -catenin and plakoglobin. (A)  $\beta$ -Catenin ( $\beta$ ) and plakoglobin (Pg) can bind, independently, to the cytoplasmic tail of cadherin adhesion receptors in adherens junctions (AJ). Via  $\alpha$ -catenin ( $\alpha$ ), they mediate cadherin association with the actin cytoskeleton. When Wnt signaling is inactive, free  $\beta$ -catenin is degraded by a multimolecular complex including the tumor suppressor APC, axin and glycogen synthase kinase (GSK), which phosphorylates  $\beta$ -catenin (PP). This complex associates with the ubiquitin-proteasome system via the ubiquitin lygase  $\beta$ -TrCP, which, together with Cul1 and Skp1, mediates the ubiquitination (Ub) of  $\beta$ -catenin and targets it for degradation by the proteasome. The binding of Wnt to the Frizzled (Frz) receptor activates Wnt signaling, and dishevelled (Dsh) inhibits  $\beta$ -catenin turnover by suppressing GSK activity. This results in the accumulation of  $\beta$ -catenin in the nucleus, its complexing with TCF family transcription factors, and activation of target gene expression. (B) Plakoglobin can interact with the same proteins as  $\beta$ -catenin but, in addition, binds to the desmosomal cadherins desmocollin and desmoglein in desmosomes (DES), mediating their interaction, via desmoplakin (Dsp) and plakophilin (Plp), with intermediate filaments (IF). The ability of plakoglobin to transactivate target genes in complex with TCF is still controversial (?).

Wnt signaling *in vivo* is still controversial, because plakoglobin cannot compensate for the absence of  $\beta$ -catenin in knockout mice (Bierkamp et al., 1996; Haegel et al., 1995; Huelsken et al., 2000; Ruiz et al., 1996). Interestingly, a recent study revealed that the expression of plakoglobin in the skin of transgenic mice (Charpentier et al., 2000) induces a phenotype very different from that conferred by  $\beta$ -catenin expression (Gat et al., 1998). This phenotype is more similar to that observed when upstream components of the Wnt pathway are overexpressed (Millar et al., 1999). We discuss the nature of these and other differences between the two catenins, and the possible involvement of plakoglobin in Wnt signaling, below.

## CATENIN STRUCTURE AND BINDING SITES FOR PROTEIN PARTNERS

Many molecules interact with  $\beta$ -catenin and plakoglobin (for examples, see Table 1). The functional consequences of some of these interactions are well established (e.g. those involving cadherins, LEF/TCF, or the APC/axin degradation machinery; see Fig. 1), whereas the significance of some other interactions is still incompletely understood.

A characteristic structural feature of catenins is a central armadillo (arm) repeat domain flanked by the C- and N-terminal domains (Hatzfeld, 1999). Although all three catenin domains can mediate protein-protein interactions, the great majority of partners bind to the arm repeat region (Table 1). The arm repeat motif folds into a single structural unit, whose tertiary structure (determined by crystallographic analysis) revealed an array of densely packed  $\alpha$ -helices that form a superhelix that has a positively charged groove that spans the entire arm repeat region (Huber et al., 1997). This groove might constitute the binding surface for the various catenin partners, which would explain the observation that at least five arm repeats are needed to maintain protein-protein interactions. No consensus sequence, however, has been detected in the arm-binding domains of the different catenin partners, although they each possess many negatively charged residues, which

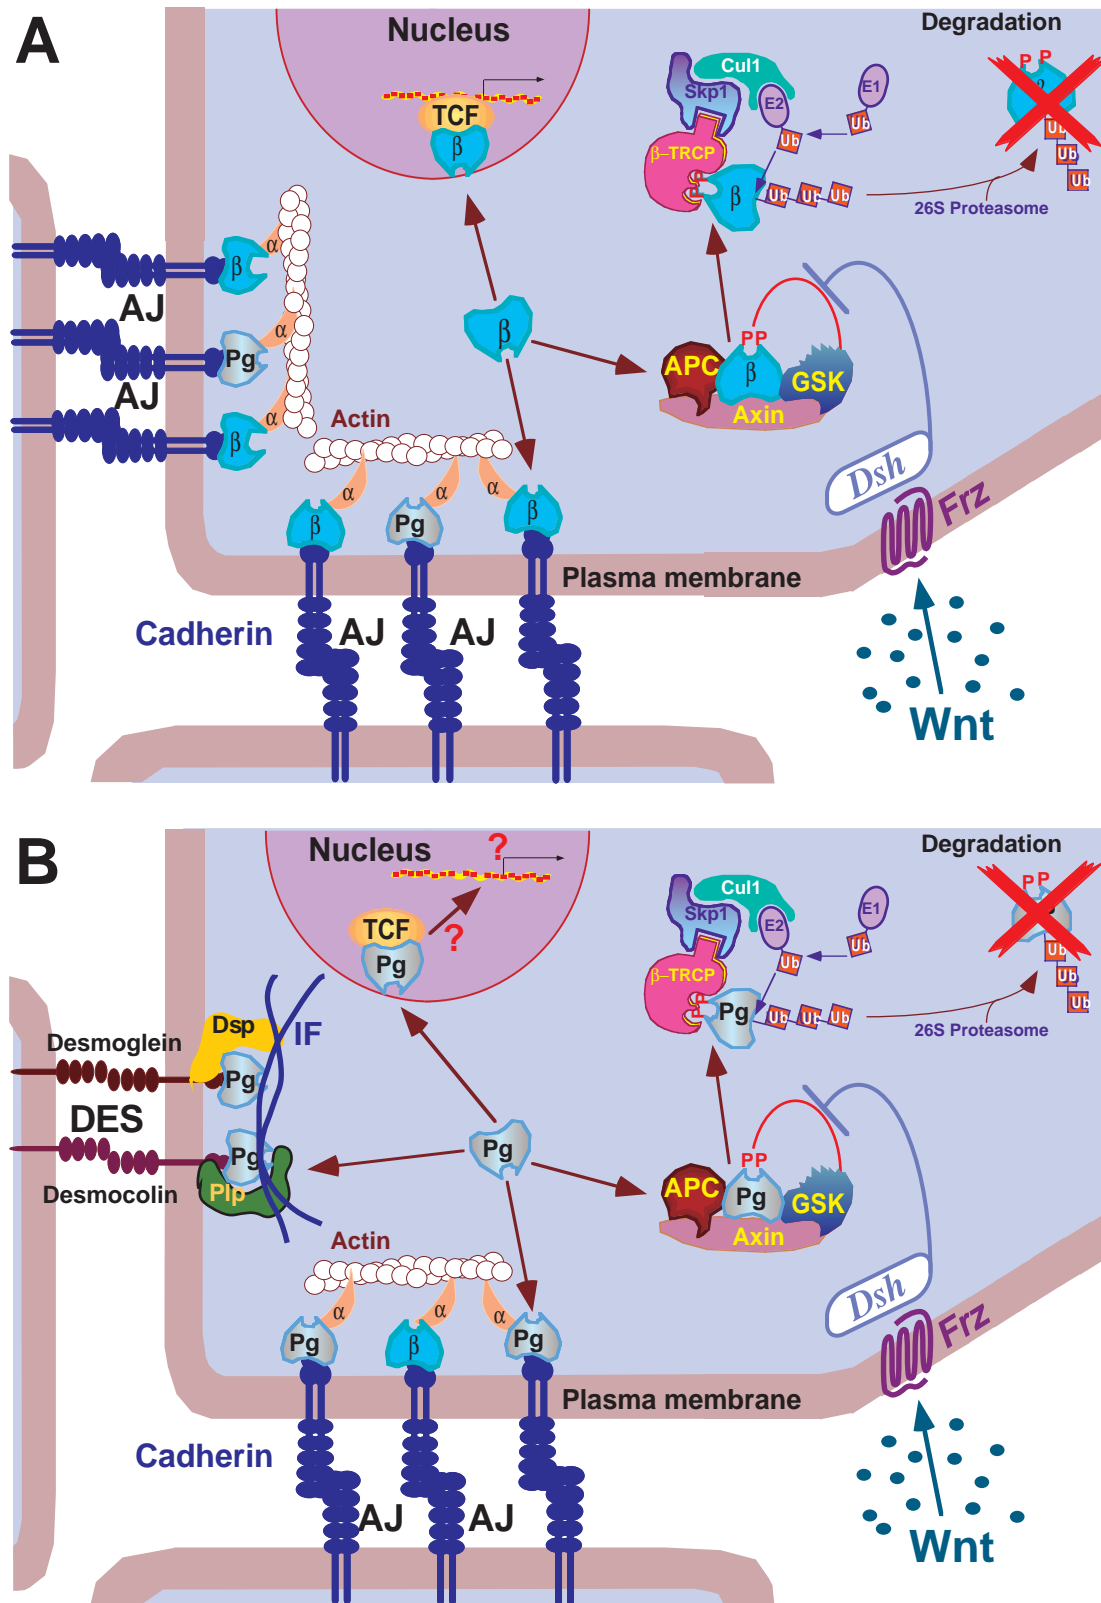

could dock into the positively charged groove formed by the arm repeats (Hsu et al., 1998; Huber et al., 1997; Omer et al., 1999). Although the nature of the binding site on the arm repeat dictates mutually exclusive binding of the various partners to

this region (Hulsken et al., 1994; Kishida et al., 1998; Orsulic et al., 1999; Rubinfeld et al., 1995; Sadot et al., 1998), the molecular interactions formed by each protein partner are unique. Thus, it is possible selectively to disrupt the binding of

**Table 1. Protein partners of  $\beta$ -catenin and plakoglobin**

| Protein partner                  | $\beta$ -Catenin binding | Plakoglobin binding | Binding site on catenins                            | Function of the interaction     | References                                                    |
|----------------------------------|--------------------------|---------------------|-----------------------------------------------------|---------------------------------|---------------------------------------------------------------|
| Classical cadherins              | +                        | +                   | Arm repeats                                         | Adhesion                        | Kemler, 1993                                                  |
| Desmocollin                      | –                        | +                   | Arm repeats                                         | Adhesion                        | Troyanovsky et al., 1994b                                     |
| Desmoglein                       | –                        | +                   | Arm repeats                                         | Adhesion                        | Troyanovsky et al., 1994a                                     |
| Desmoplakin                      | –                        | +                   | Arm repeats                                         | Adhesion                        | Kowalczyk et al., 1997                                        |
| Fascin                           | +                        | ND*                 | Arm repeats                                         | Adhesion                        | Tao et al., 1996                                              |
| IQGAP                            | +                        | ND                  | N terminus and the 1st arm repeat                   | Adhesion                        | Fukata M et al., 1999; Kuroda et al., 1998                    |
| Keratin 5                        | –                        | +                   | ND                                                  | Adhesion                        | Smith and Fuchs, 1998                                         |
| MAGI                             | +                        | ND                  | C terminus                                          | Adhesion                        | Dobrosotskaya and James, 2000                                 |
| p35-Cdk5 kinase                  | +                        | ND                  | Arm repeats                                         | Adhesion                        | Kwon et al., 2000                                             |
| Protein-tyrosine phosphatase LAR | +                        | +                   | ND                                                  | Adhesion                        | Muller et al., 1999                                           |
| $\alpha$ -Catenin                | +                        | +                   | N terminus and the 1st arm repeat                   | Adhesion                        | Aberle et al., 1996                                           |
| FAM                              | +                        | ND                  | ND                                                  | Catenin de-ubiquitination       | Taya et al., 1999                                             |
| EGFR                             | +                        | ND                  | Arm repeats                                         | Catenin phosphorylation         | Hoschuetzky et al., 1994; Takahashi et al., 1997              |
| APC                              | +                        | +                   | Arm repeats                                         | Degradation                     | Rubinfeld et al., 1993; Shibata et al., 1994                  |
| Axin/conductin                   | +                        | +                   | Arm repeats                                         | Degradation                     | Behrens et al., 1998; Ikeda et al., 1998; Kodama et al., 1999 |
| $\beta$ -TrCP                    | +                        | +                   | N terminus                                          | Degradation                     | Hart et al., 1999; Sadot et al., 2000; Winston et al., 1999   |
| Presenilin                       | +                        | ND                  | ND                                                  | Degradation (?)                 | Murayama et al., 1998; Yu et al., 1998; Zhang et al., 1998    |
| NLK                              | +                        | ND                  | N terminus                                          | LEF/TCF phosphorylation         | Ishitani et al., 1999                                         |
| Caveolin-1                       | +                        | +                   | ND                                                  | Membrane localization (?)       | Galbiati et al., 2000                                         |
| Nup1                             | +                        | ND                  | ND                                                  | Nuclear import                  | Fagotto et al., 1998                                          |
| PI3 kinase                       | +                        | ND                  | ND                                                  | Regulation of catenin stability | Espada et al., 1999                                           |
| CBP/P300                         | +                        | ND                  | N and C terminus                                    | Transactivation                 | Hecht et al., 2000; Takemaru and Moon, 2000                   |
| LEF-1                            | +                        | +                   | Arm repeats                                         | Transactivation                 | Behrens et al., 1996; Huber et al., 1996                      |
| Pontin                           | +                        | ND                  | N terminus and arm repeats                          | Transactivation                 | Bauer et al., 1998                                            |
| RAR                              | +                        | ND                  | Arm repeats                                         | Transactivation                 | Easwaran et al., 1999                                         |
| SMAD4                            | +                        | ND                  | ND                                                  | Transactivation                 | Nishita et al., 2000                                          |
| SOX17                            | +                        | ND                  | Arm repeats                                         | Transactivation                 | Zorn et al., 1999                                             |
| TBP                              | +                        | +                   | N and C terminus (in plakoglobin – C terminus only) | Transactivation                 | Hecht et al., 1999                                            |
| TCFs                             | +                        | ND                  | Arm repeats                                         | Transactivation                 | Korinek et al., 1997; Molenaar et al., 1996                   |

\*ND, not determined.

certain proteins to the arm repeats by mutations within the arm domain, but maintain the binding of other partners (Prieve and Waterman, 1999).

The mutually exclusive binding of catenins to different partners, and the different localizations of various catenin complexes in the cell, contributes to their distinct molecular compositions (Fig. 1). The binding sites for partners in the N- and C-terminal domains of catenins, in addition to the arm domain, enable the catenins to act as scaffolds for multiprotein assemblies. For example, the N-termini of  $\beta$ -catenin and plakoglobin can recruit  $\alpha$ -catenin to ternary complexes containing cadherin family adhesion receptors (Aberle et al., 1994; Nagafuchi et al., 1994), thus bridging adherens junctions to the actin cytoskeleton (Fig. 1). In the nucleus, both the N- and C-termini of  $\beta$ -catenin link the  $\beta$ -catenin:LEF/TCF complex to the basal transcription machinery (Hsu et al., 1998; van de Wetering et al., 1997) via interactions with TATA-box-binding protein (TBP) (Hecht et al., 1999) and CREB-binding protein (CBP) (Hecht et al., 2000; Takemaru and Moon, 2000). In the degradation complex,  $\beta$ -catenin is recruited via its arm repeat domain by APC (Hulsken et al., 1994; Rubinfeld et al., 1993; Su et al.,

1993) and axin (Behrens et al., 1998; Kishida et al., 1998), and is ubiquitinated after interaction between the phosphorylated serines on its N terminus (by GSK) and the  $\beta$ -TrCP ubiquitin ligase (Hart et al., 1999; Jiang and Struhl, 1998; Kitagawa et al., 1999; Latres et al., 1999; Liu et al., 1999; Sadot et al., 2000; Winston et al., 1999). This scaffolding function of  $\beta$ -catenin (and probably also of plakoglobin) in the assembly of mutually exclusive complexes (Fig. 1) is essential for cell adhesion and Wnt signaling and provides a mechanism for cross-talk between these processes.

## REGULATION OF CATENIN INTERACTIONS

The different catenin complexes described above co-exist simultaneously in the cell (Fig. 1A). The recruitment of  $\beta$ -catenin into each of these complexes is regulated by the relative abundance of  $\beta$ -catenin and the various factors that bind  $\beta$ -catenin (Fagotto et al., 1996; Heasman et al., 1994; Hulsken et al., 1994; Orsulic et al., 1999; Sadot et al., 1998; Sanson et al., 1996; Simcha et al., 1998) and by phosphorylation-dependent changes in the affinity of interactions between catenins and



their partners (Behrens et al., 1993; Kinch et al., 1995; Roura et al., 1999; Willert et al., 1999).

### Competition between catenin partners for binding to $\beta$ -catenin

Competition between different catenin partners for a limited pool of catenins can regulate the function of catenins. For example, overexpression of cadherins results in the recruitment of the majority of  $\beta$ -catenin into adherens junctions, thus reducing its availability for complexing with LEF/TCF factors and thereby inhibiting  $\beta$ -catenin-mediated transcription (Orsulic et al., 1999; Sadot et al., 1998; Simcha et al., 1998). Such cadherin overexpression leads to severe aberrations in the development of *Xenopus* (Fagotto et al., 1996; Heasman et al., 1994) and *Drosophila* (Sanson et al., 1996), which requires signaling by  $\beta$ -catenin. In contrast, the decrease in cell-cell adhesion during the epithelial-mesenchymal transition might lead to the release of some cadherin-associated  $\beta$ -catenin, which could contribute to activation of LEF/TCF-dependent transcription (Eger et al., 2000; Espada et al., 1999). The interaction between cadherins and  $\beta$ -catenin, in addition to sequestering the potential signaling pool of  $\beta$ -catenin, also competes with the APC-axin  $\beta$ -catenin degradation machinery, thereby protecting the pool of catenins that is involved in adhesion from degradation (Hulsken et al., 1994; Rubinfeld et al., 1995).

Whereas overexpression of cadherins results in the sequestering of  $\beta$ -catenin away from the nucleus and inhibition of its signaling function, overexpression of LEF-1, in contrast, leads to translocation of  $\beta$ -catenin to the nucleus in MDCK cells (Simcha et al., 1998) and induces double axis formation in *Xenopus* (Behrens et al., 1996), through the  $\beta$ -catenin:LEF/TCF pathway (Fagotto et al., 1996; Heasman et al., 1994; Molenaar et al., 1996).

In addition to competition between the cytoplasmic and nuclear partners for  $\beta$ -catenin binding, there might be competition between several transcription factors that interact with  $\beta$ -catenin in a mutually exclusive fashion. For example, the binding of  $\beta$ -catenin to LEF/TCF family members (Behrens et al., 1996; Huber et al., 1996; van de Wetering et al., 1997), members of the SOX subfamily of HMG domain-containing transcription factors (Zorn et al., 1999) and to retinoic acid receptor (RAR $\alpha$ ) (Easwaran et al., 1999) is mediated by an interaction with the arm domain of  $\beta$ -catenin.

The various members of the LEF/TCF family differ in their abilities to interact with regulatory (co-repressor) proteins such as groucho (Levanon et al., 1998; Roose et al., 1998), CtBP (Brannon et al., 1999) and with  $\beta$ -catenin (Roose et al., 1999). Thus, competition between different LEF/TCF factors for  $\beta$ -catenin binding might affect the regulation of  $\beta$ -catenin-dependent transactivation by these proteins. Transcription factors such as SOX17 and RAR $\alpha$  also compete with LEF/TCF for  $\beta$ -catenin binding, and inhibit LEF/TCF-dependent transcription (Zorn et al., 1999). In addition to suppressing LEF/TCF signaling, the association between  $\beta$ -catenin and RAR is suggested to mediate the co-activation of RAR-regulated target genes by  $\beta$ -catenin (Easwaran et al., 1999). The role played by these interactions of  $\beta$ -catenin with SOX17 and RAR in vivo remains, however, to be determined.

Since the interaction of  $\beta$ -catenin with transcription factors is mediated mostly by the arm domain of the molecule, which is highly homologous to that of plakoglobin (Cowin and Burke,

1996), plakoglobin might also interact with the same nuclear partners (Fig. 1B). Plakoglobin forms a complex with LEF-1 when the two molecules are co-transfected into cells (Huber et al., 1996; Simcha et al., 1998), but its ability to bind to other nuclear proteins will have to be investigated.

Cell-cell contacts of both the adherens junction and desmosome types contain plakoglobin (Cowin et al., 1986; Fig. 1B). A competition between classical and desmosomal cadherins for plakoglobin binding is involved in the regulation of the assembly of these junctions (Ben-Ze'ev and Geiger, 1998; Cowin and Burke, 1996; Lewis et al., 1997). In adherens junctions, plakoglobin binds to  $\alpha$ -catenin and anchors adherens junctions to actin (Knudsen et al., 1995; Fig. 1A), whereas, in desmosomes, plakoglobin binds to the desmosomal cadherins desmocollin and desmoglein (Trojanovsky et al., 1994a,b) and to desmoplakin (Kowalczyk et al., 1997) and keratins (Smith and Fuchs, 1998), providing a link to the intermediate filament cytoskeleton (Schmidt et al., 1994; Fig. 1B). Interestingly, although plakoglobin can anchor classical cadherins via  $\alpha$ -catenin to actin in adherens junctions, it loses this ability when incorporated into desmosomes. This specificity is achieved by mutually exclusive interactions of plakoglobin with  $\alpha$ -catenin and desmosomal cadherins (Chitaev et al., 1998).

In the absence of Wnt signaling, when the level of free  $\beta$ -catenin is relatively low, there is probably strong competition for the limiting amount of  $\beta$ -catenin (and most probably plakoglobin) among various partners. When  $\beta$ -catenin accumulates, in response to activation of the Wnt pathway, this competition is relieved and  $\beta$ -catenin can function in both Wnt signaling and cell adhesion (Hinck et al., 1994; Shibamoto et al., 1998; Yanagawa et al., 1997).

### Competition between $\beta$ -catenin and plakoglobin

The binding of the two catenins to common protein partners (Fig. 1) raises the possibility of competition between these two proteins for their various partners. For example, the expression of high levels of exogenous plakoglobin can efficiently displace the endogenous  $\beta$ -catenin from adherens junctions, leading to its degradation by the proteasome (Salomon et al., 1997). Similarly, in plakoglobin-knockout mice,  $\beta$ -catenin is incorporated into desmosomes, which are normally devoid of this protein (Bierkamp et al., 1999; Ruiz et al., 1996). The competition for binding to the degradation machinery between  $\beta$ -catenin and overexpressed plakoglobin (Miller et al., 1999; Simcha et al., 1998) or membrane-anchored forms of both catenins (Klymkowsky et al., 1999; Miller and Moon, 1997) might compromise degradation, cause accumulation of the endogenous  $\beta$ -catenin (Miller et al., 1999; Simcha et al., 1998) and therefore activate LEF/TCF-mediated transcription (Klymkowsky et al., 1999; Simcha et al., 1998; Zhurinsky et al., 2000; Fig. 2A). This type of competition, however, was demonstrated only in cells overexpressing plakoglobin, and it is not known whether the endogenous plakoglobin competes at sites other than adherens junctions, or whether plakoglobin can regulate  $\beta$ -catenin signaling in vivo.

### Nucleocytoplasmic shuttling of catenins

Regulation of catenin levels by the Wnt pathway is considered to be the major mechanism by which catenins are driven into the nucleus. However, the balance between catenin functions in the cytoplasm and the nucleus might also be regulated by

mechanisms controlling their import into and export from the nucleus. Catenins lack classical nuclear localization signal sequences (NLSs) and probably accumulate in the nucleus by two mechanisms. Two groups have demonstrated direct, importin-independent nuclear import of  $\beta$ -catenin in a semi-permeabilized cell model for nuclear import (Fagotto et al., 1998; Yokoya et al., 1999), which could be mediated by the interaction between  $\beta$ -catenin and the Nup1 nucleoporin (Fagotto et al., 1998). Alternatively, since overexpression of LEF/TCF leads to  $\beta$ -catenin accumulation in the nucleus (Behrens et al., 1996; Molenaar et al., 1996; Simcha et al., 1998), it was suggested that the nuclear import of the  $\beta$ -catenin/LEF (or plakoglobin/LEF) complex is mediated by the classical NLS provided by LEF/TCF proteins. It is also possible that if  $\beta$ -catenin normally shuttles between the cytoplasm and the nucleus, overexpression of LEF/TCF leads to a more efficient sequestration of catenins by LEF/TCF in the nucleus. Since the elevation in the levels of either  $\beta$ -catenin or plakoglobin leads to their nuclear accumulation when the levels of LEF/TCF are very low (Simcha et al., 1996, 1998), LEF/TCF-independent mechanisms are likely to be important for regulating the nuclear import of catenins *in vivo*.

Interestingly, the *Drosophila*  $\beta$ -catenin homolog, Armadillo, is excluded from the nuclei of some cells that display high levels of this protein in the cytoplasm (Cox et al., 1999b). This implies that there might be a regulation of catenin nuclear import/export, or a specific anchoring of the protein in the cytoplasm, when its levels increase, which would prevent its nuclear localization. Such anchoring might occur, for example, in cells expressing mutant presenilin, since the inhibition of  $\beta$ -catenin degradation by LiCl (an inhibitor of GSK activity) in such cells results in accumulation of  $\beta$ -catenin in the cytoplasm and not, as expected, in the nucleus (Nishimura et al., 1999).

Since the arm repeat domain implicated in the nuclear import of catenins is very similar in  $\beta$ -catenin and plakoglobin (Cowin and Burke, 1996), it is conceivable that plakoglobin, when overexpressed, can enter the nucleus by a mechanism similar to that used by  $\beta$ -catenin. However, the soluble pool of endogenous plakoglobin in epithelial cells is much smaller than that of  $\beta$ -catenin (Sadot et al., 2000; Simcha et al., 1998). This probably explains the observation that plakoglobin, in contrast to  $\beta$ -catenin, is not translocated into the nucleus following LEF-1 overexpression in MDCK cells (Simcha et al., 1998), or transfection of dominant negative  $\beta$ -TrCP, both of which result in  $\beta$ -catenin localization to the nucleus (Sadot et al., 2000; Simcha et al., 1998).

### Phosphorylation of catenins and their partners

Catenins undergo serine/threonine and tyrosine phosphorylation that regulates their interactions with other proteins. The N-termini of  $\beta$ -catenin and plakoglobin contain the GSK consensus phosphorylation site (Aberle et al., 1997; Yost et al., 1996). However, GSK does not efficiently phosphorylate mammalian  $\beta$ -catenin *in vitro* and needs to be linked to  $\beta$ -catenin by axin, which contains binding sites for both proteins (Kitagawa et al., 1999). The phosphorylation of the N-terminal serine residues of catenins is required for their interaction with the ubiquitin ligase  $\beta$ -TrCP and their subsequent degradation by the proteasome (Hart et al., 1999; Kitagawa et al., 1999; Latres et al., 1999; Liu et al., 1999; Sadot et al., 2000; Winston et al., 1999; Fig. 1). Point mutations in

these phosphorylation sites lead to stabilization of  $\beta$ -catenin and activation of  $\beta$ -catenin-dependent transactivation in a variety of tumors (Ben-Ze'ev and Geiger, 1998; Morin, 1999; Polakis, 1999). In addition to enhancing catenin degradation, the phosphorylation of catenins by GSK increases their binding *in vitro* to the cytoplasmic domain of cadherin (Miller and Moon, 1997), but the significance of this observation to catenin function in cells is unclear.

$\beta$ -Catenin and plakoglobin are also phosphorylated on tyrosine residues by receptor and non-receptor tyrosine kinases (Hamaguchi et al., 1993; Matsuyoshi et al., 1992), and the EGF receptor directly interacts with  $\beta$ -catenin and plakoglobin (Hoschuetzky et al., 1994; Muller et al., 1999). The decrease in affinity of  $\beta$ -catenin for cadherin upon phosphorylation by SRC (Roura et al., 1999) is consistent with the observation that the non-junctional catenin pool is preferentially phosphorylated on tyrosine (Kinch et al., 1995) and might represent a mechanism for regulation of cell adhesion by tyrosine kinases and phosphatases. Whether tyrosine phosphorylation of catenins affects their interaction with partners in the degradation complex or with transcription factors in the nucleus remains to be determined.

The interactions of catenins with their junctional partners and with the degradation machinery are affected by phosphorylation of the catenin partners. Since the binding site for catenin partners in the arm repeat domains of catenins is enriched in positively charged residues, the interactions mediated by this catenin domain are enhanced by the phosphorylation of the binding sites of catenin partners. Thus, the phosphorylated forms of APC and axin display markedly enhanced binding to  $\beta$ -catenin (Rubinfeld et al., 1996; Willert et al., 1999), and dephosphorylation of axin, in response to Wnt signaling, results in the release of  $\beta$ -catenin from the degradation complex (Jho et al., 1999; Willert et al., 1999). The phosphorylation of cadherin by GSK and casein kinase II also increases the affinity of  $\beta$ -catenin for the cadherin cytoplasmic domain (Lickert et al., 2000).

### Regulation of catenin function by their terminal domains

In contrast to their arm domains, the N- and C-terminal domains of  $\beta$ -catenin and plakoglobin share little sequence similarity (Cowin and Burke, 1996). Recent studies have indicated that the terminal domains of both catenins might also be involved in regulating the interaction of the arm repeats with various protein partners (Chitaev et al., 1996; Palka and Green, 1997; Wahl et al., 2000; Zhurinsky et al., 2000). For example, the binding of catenins to cadherins through the arm repeats is enhanced by deletion of the C terminus in plakoglobin (Chitaev et al., 1996). Such a deletion can also markedly stimulate the assembly of plakoglobin-containing desmosomes (Palka and Green, 1997). The exclusion of  $\beta$ -catenin from desmosomes involves the terminal domains of the molecule, since the arm domain of  $\beta$ -catenin can efficiently bind to desmosomal cadherins (Wahl et al., 2000). Comparison of the abilities of  $\beta$ -catenin-plakoglobin chimeras to bind to desmoglein 2 demonstrated that the N- and C-terminal domains of  $\beta$ -catenin cooperate to abolish this binding, and when these domains of plakoglobin are replaced by those of  $\beta$ -catenin the resulting chimeric molecule cannot bind to desmoglein 2 (Wahl et al., 2000).

**Fig. 2.** Differential effects of  $\beta$ -catenin and plakoglobin on TCF-mediated transactivation. (A) In cells overexpressing plakoglobin, the sequestration (by plakoglobin) of components in the degradation machinery, which regulates  $\beta$ -catenin turnover, leads to  $\beta$ -catenin accumulation and activation of  $\beta$ -catenin–TCF-mediated gene expression. Plakoglobin–TCF complexes in the nucleus inefficiently form ternary complexes containing DNA (see Zhurinsky et al., 2000). (B) Although the armadillo repeats (arm) of both  $\beta$ -catenin (a) and plakoglobin (c) can effectively form a ternary complex with TCF, the N- and C-terminal domains of plakoglobin inhibit DNA-containing ternary-complex formation (b). A mechanism that might promote transactivation by plakoglobin may involve a hypothetical protein (X) (d) whose binding to plakoglobin results in a conformational change allowing complexing between plakoglobin, TCF and the DNA.

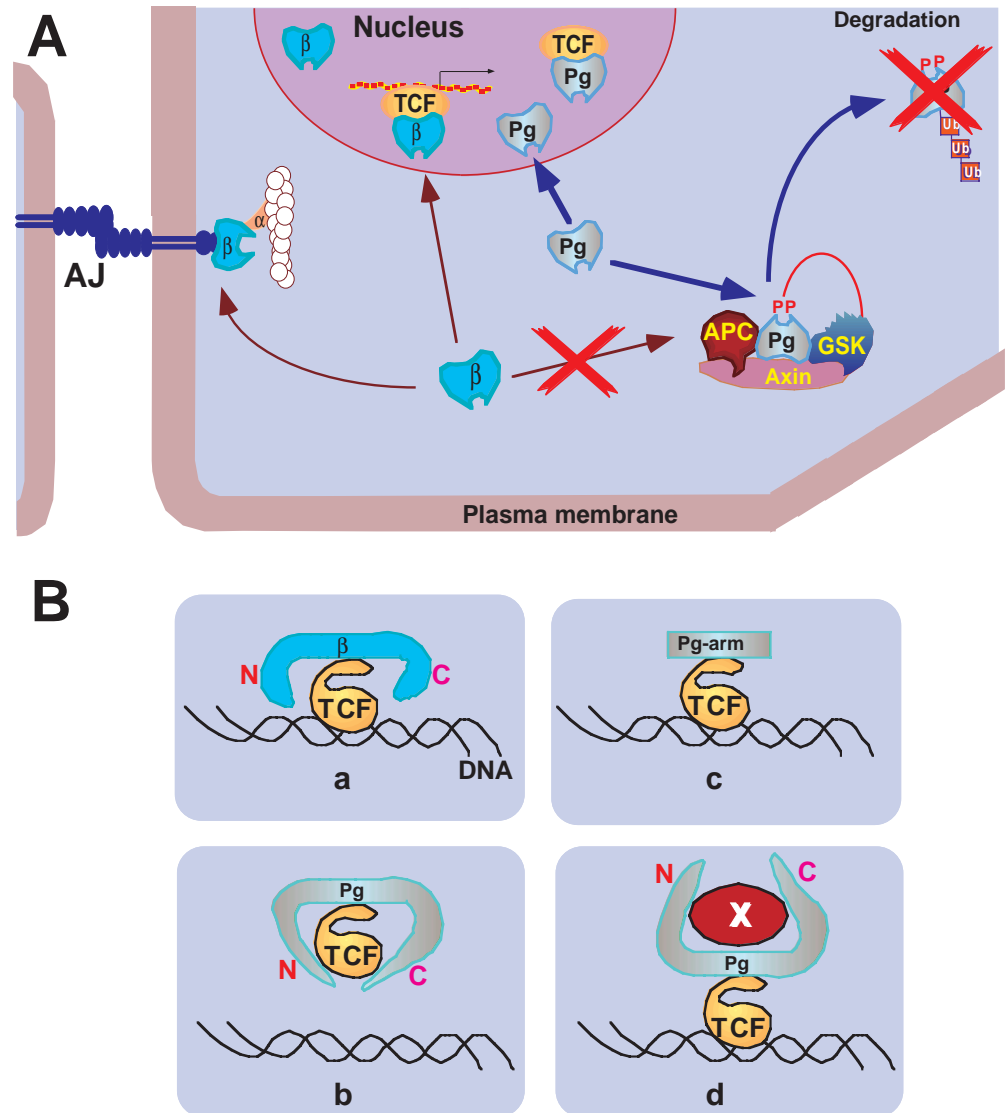

The terminal domains of both  $\beta$ -catenin and plakoglobin are also involved in the downregulation of catenin:LEF:DNA ternary complex formation (Zhurinsky et al., 2000; Fig. 2B). Although full-length plakoglobin interacts with LEF-1 almost as efficiently as does  $\beta$ -catenin (Fig. 2A,B), its ability to form a ternary complex with LEF-1 and DNA is very weak (Zhurinsky et al., 2000). In contrast, a construct containing the arm domain of plakoglobin alone very efficiently assembles into ternary complexes (Fig. 2B,c). An inhibitory action of the terminal domains is apparently common to both catenins, since the arm repeats of  $\beta$ -catenin also form ternary complexes more efficiently than does the full-length protein (Zhurinsky et al., 2000).

Given that the C-termini of  $\beta$ -catenin and plakoglobin contain the acidic transactivation domain, and the arm repeats form the positively charged binding site, the C-termini of catenins might interact with the arm domain and thus regulate the interactions with proteins that bind to this site (Fig. 2B,b). This notion is supported by the finding that the C terminus of *Drosophila* Armadillo can bind to its arm repeat domain in a

two-hybrid screen (Cox et al., 1999a). An alternative possibility is that the N- and C-termini interact, which Wahl et al., have demonstrated by a modified two-hybrid assay (Wahl et al., 2000; Fig. 2B,b). Although the exact nature of these intramolecular interactions in catenins remains to be unraveled, they propose the intriguing possibility that interactions between catenins and their partners are modulated by such intramolecular interactions. For example, the binding of transcription factors (e.g. CBP, TBP) to the catenin terminal domains may promote binding of the LEF-catenin complex to DNA (Zhurinsky et al., 2000; Fig. 2B,d). Moreover, one can speculate that the decrease in the affinity of catenins for cadherin, upon catenin tyrosine phosphorylation of the last arm repeat (Roura et al., 1999), might involve negative regulation of cadherin-catenin interaction by the catenin's C terminus (Chitaev et al., 1996). These intriguing possibilities remain to be addressed experimentally.

In conclusion, the regulation of interactions between catenins and their partners is achieved through several mechanisms, including competition between different



partners, phosphorylation and intramolecular interactions. The understanding of the cooperation and cross-talk between these mechanisms in the fine tuning of the numerous functions catenins perform in development and cancer remains the challenge for future investigation.

## THE FUNCTION OF CATENINS IN DEVELOPMENT AND CANCER

### Catenins and development

Catenin-mediated cell adhesion and Wnt signaling both play multiple roles in various developmental processes and also in the adult organism. Adherens junctions define tissue integrity, mediate specific cell-cell recognition, participate in determining epithelial cell polarity and sequester many signaling molecules to cell adhesion sites, thereby regulating signal transduction (Barth et al., 1997; Behrens, 1999; Ben-Ze'ev, 1999; Gumbiner, 1996; Steinberg and McNutt, 1999). Wnt signaling elicits a very broad range of catenin-dependent and -independent responses (Peifer and Polakis, 2000), including specification of cell fate at different stages of development (Wodarz and Nusse, 1998), regulation of cell proliferation (Gat et al., 1998; Kolligs et al., 1999; Orford et al., 1999; Young et al., 1998) and survival (Orford et al., 1999), cytoskeletal remodeling to define cell polarity (Peifer and Polakis, 2000; Thorpe et al., 2000) and cell motility (Heisenberg et al., 2000; Wallingford et al., 2000).

The requirements for  $\beta$ -catenin and plakoglobin in cell adhesion and Wnt signaling have been compared by genetic analysis in *Drosophila*, *Xenopus* and mice. In *Drosophila*, mutations that disrupt Armadillo functions lead to defects in both cell adhesion and Wnt signaling. Although both  $\beta$ -catenin and plakoglobin can complement the adhesion defects,  $\beta$ -catenin demonstrated only partial signaling activity, and plakoglobin was completely inactive in signaling (White et al., 1998).

In *Xenopus*, maternal  $\beta$ -catenin establishes the dorso-ventral asymmetry (Funayama et al., 1995; Heasman et al., 1994) and specifies formation of axial structures by acting as part of the Wnt signaling pathway (Sumanas et al., 2000). Although *Xenopus* plakoglobin is also expressed at this stage of development, it cannot compensate for  $\beta$ -catenin removal, and depletion of maternal plakoglobin RNA does not affect axis specification, which indicates that  $\beta$ -catenin has a specific role in this process (Kofron et al., 1997). Initial studies showing that the ventral microinjection of plakoglobin in *Xenopus* embryos induces dorsalization of the embryos (similarly to  $\beta$ -catenin) were thus unexpected (Karnovsky and Klymkowsky, 1995). However, later studies have shown that cells expressing high levels of exogenous plakoglobin display increased levels of endogenous  $\beta$ -catenin (probably resulting from sequestration of key components in  $\beta$ -catenin degradation), thus suggesting that there is an indirect action via  $\beta$ -catenin (Miller and Moon, 1997). This issue is still under debate, because Klymkowsky et al., have suggested that additional mechanisms of action of membrane-tethered catenins involve recruitment of LEF/TCF factors in the cytoplasm (Klymkowsky et al., 1999).

The elimination of either  $\beta$ -catenin or plakoglobin by gene knockout in mice results in embryonic lethality (Bierkamp et al., 1996; Haegel et al., 1995; Huelsken et al., 2000; Ruiz et al.,

1996). The phenotypes that lead to embryonal death are, however, very different for the two catenins. Whereas the lack of plakoglobin leads to defects in desmosome assembly that result in compromised heart development (Bierkamp et al., 1996; Ruiz et al., 1996), mice lacking  $\beta$ -catenin are characterized by an inability to form dorsal structures in the developing embryos (Huelsken et al., 2000). These defects reflect the importance of  $\beta$ -catenin in Wnt-mediated axis formation. In contrast, adherens junctions are well developed in  $\beta$ -catenin-null embryos, and elevated plakoglobin levels compensate for the adhesive role of  $\beta$ -catenin (Haegel et al., 1995; Huelsken et al., 2000). Owing to the early embryonal lethality in plakoglobin-knockout mice, one cannot rule out the possibility that plakoglobin-mediated Wnt signaling is needed at later stages of development. Future studies employing conditional, tissue-specific, knockouts might reveal the requirements for plakoglobin in development and in the adult organism.

Intriguing studies of transgenic mice expressing either  $\beta$ -catenin or plakoglobin under a skin-specific keratin 14 promoter recently implicated plakoglobin in signaling (Charpentier et al., 2000; Gat et al., 1998).  $\beta$ -Catenin expressed under this promoter stimulated de novo hair follicle proliferation and, at a later stage, caused hair tumors in adult mice (Gat et al., 1998). In contrast, plakoglobin expression driven by the same promoter resulted in an opposite phenotype displaying hair growth that was slower in comparison with that of wild-type mice and a decrease in the period of the hair growth phase (Charpentier et al., 2000). It is not known whether this phenotype resulted from attenuation of  $\beta$ -catenin nuclear signaling, since immunofluorescence studies revealed no change in  $\beta$ -catenin levels or localization in the skin of these mice. Such effects could still be related to subtle changes in endogenous  $\beta$ -catenin (due to plakoglobin overexpression) that were below the detection limit of immunofluorescence.

Other studies suggest that plakoglobin recruits LEF/TCF proteins into a plakoglobin-containing complex that binds to DNA very inefficiently (Zhurinsky et al., 2000; Fig. 2B), which can potentially antagonize  $\beta$ -catenin:LEF/TCF signaling. Alternatively, plakoglobin might form a transcriptional complex that has a different specificity of DNA recognition and induces plakoglobin-specific target genes (Fig. 2B,d). This notion is supported by the observation that expression of WNT-3 or DVL-2 (an isoform of dishevelled, Fig. 1) in the skin of transgenic mice (Millar et al., 1999) results in phenotypes that are similar to those observed when plakoglobin is overexpressed (Charpentier et al., 2000) and very different from those displayed in mice overexpressing  $\beta$ -catenin. This may indicate the involvement of plakoglobin in Wnt signaling downstream of Wnt-3 and Dvl-2 (Millar et al., 1999). Note, however, that both Wnt-3 and Dvl-2 are very efficient at elevating  $\beta$ -catenin levels in cultured cells (Lee et al., 1999). By examining the effects of Wnt-3 and Dvl-2 on plakoglobin and  $\beta$ -catenin and comparing them with the effects of other components of the Wnt pathway (and of other Wnt isoforms), we should learn more about the possible involvement of plakoglobin in Wnt signal transduction and whether this role is different from that played by  $\beta$ -catenin.

### Differential involvement of $\beta$ -catenin and plakoglobin in cancer progression

$\beta$ -Catenin levels are elevated in cancers of various origins and



in different organs (Ben-Ze'ev, 1997; Ben-Ze'ev and Geiger, 1998; Morin, 1999; Polakis, 1999). These increases in  $\beta$ -catenin levels result mostly from mutations in  $\beta$ -catenin itself that affect residues in the GSK-phosphorylation sites critical for  $\beta$ -catenin degradation. In addition, mutations in key components of the degradation machinery, such as APC or axin, have also been detected in some tumors (Morin et al., 1997; Satoh et al., 2000). The result of such mutations is an elevation in  $\beta$ -catenin content and activation of  $\beta$ -catenin:LEF/TCF-dependent transcription. This could contribute to uncontrolled cell proliferation and tumor progression (Gumbiner, 1997; Korinek et al., 1997; Peifer, 1997). Several target genes of the  $\beta$ -catenin:LEF/TCF complex have been implicated in the oncogenic effect conferred by  $\beta$ -catenin signaling. Induction of the genes that encode MYC and cyclin D1, whose promoters contain LEF/TCF-binding sites, might provide the molecular basis for growth regulation by  $\beta$ -catenin signaling (He et al., 1998; Shtutman et al., 1999; Tetsu and McCormick, 1999), whereas the induction of matrilysin expression could promote cell invasion (Crawford et al., 1999). In addition, PPAR $\delta$ , a transcription factor involved in colon cancer, is also a target for the  $\beta$ -catenin-TCF complex (He et al., 1999).

In contrast to frequent mutations in  $\beta$ -catenin in tumors of different origin (Morin, 1999; Polakis, 1999), only one case of plakoglobin mutation has been reported in gastric cancer (Caca et al., 1999). Moreover, plakoglobin expression is often lost during cancer progression (Aberle et al., 1995) and restoration of plakoglobin expression in several highly tumorigenic cells lacking plakoglobin can suppress their tumorigenicity (Ben-Ze'ev 1997; Simcha et al., 1996). However, a transforming activity of plakoglobin has also been recently reported (Kolligs et al., 2000). Kolligs and co-authors observed a higher efficiency of MYC induction by plakoglobin compared with  $\beta$ -catenin (Kolligs et al., 2000). Although plakoglobin forms a complex with LEF/TCF and DNA inefficiently in human 293T cells (Zhurinsky et al., 2000; Fig. 2A), the possibility that cell-type-specific factors allow signaling by plakoglobin, either in complex with LEF/TCF (Fig. 2B,d) or with other transcription factors, remains to be investigated.

## CONCLUSIONS

The studies discussed above reveal a complex network of interactions involving the catenins, which cooperate to regulate the many functions attributed to  $\beta$ -catenin and plakoglobin. The emerging mechanisms regulating binding of catenins to their partners involve phosphorylation and intramolecular interactions, and accumulating evidence suggests that plakoglobin also has a role in signaling. Whether plakoglobin participates in Wnt signal transduction, and how the various functions of plakoglobin, which differ from those of  $\beta$ -catenin, are regulated remains to be determined. Comparing the effects of plakoglobin and  $\beta$ -catenin on transcription, defining new potential target genes for  $\beta$ -catenin and plakoglobin by DNA-chip technology and studies with transgenic mice employing tissue-specific elimination of  $\beta$ -catenin and plakoglobin will provide some answers to these intriguing questions about the functions of catenins in development and cancer.

We thank Prof. Alexander Bershadsky for help with preparing the figures. The studies from the authors' laboratory are supported by grants from the German-Israeli Foundation for Scientific Research and Development, the Cooperation Program in Cancer Research between the German Cancer Research Center (DKFZ) and the Israeli Ministry of Science and Arts (IMOSA) and CaP CURE.

## REFERENCES

- Aberle, H., Butz, S., Stappert, J., Weissig, H., Kemler, R. and Hoschuetzky, H. (1994). Assembly of the cadherin-catenin complex in vitro with recombinant proteins. *J. Cell Sci.* **107**, 3655-3663.
- Aberle, H., Bierkamp, C., Torchard, D., Serova, O., Wagner, T., Natt, E., Wirsching, J., Heidkamper, C., Montagna, M. and Lynch, H. (1995). The human plakoglobin gene localizes on chromosome 17q21 and is subjected to loss of heterozygosity in breast and ovarian cancers. *Proc. Nat. Acad. Sci. USA* **92**, 6384-6388.
- Aberle, H., Schwartz, H., Hoschuetzky, H. and Kemler, R. (1996). Single amino acid substitutions in proteins of the armadillo gene family abolish their binding to  $\alpha$ -catenin. *J. Biol. Chem.* **271**, 1520-1526.
- Aberle, H., Bauer, A., Stappert, J., Kispert, A. and Kemler, R. (1997).  $\beta$ -catenin is a target for the ubiquitin-proteasome pathway. *EMBO J.* **16**, 3797-3804.
- Adams, C. and Nelson, W. (1998). Cytomechanics of cadherin-mediated cell-cell adhesion. *Curr. Opin. Cell Biol.* **10**, 572-577.
- Barth, A., Nathke, I. and Nelson, W. (1997). Cadherins, catenins and APC protein: interplay between cytoskeletal complexes and signaling pathways. *Curr. Opin. Cell Biol.* **9**, 683-690.
- Bauer, A., Huber, O. and Kemler, R. (1998). Pontin52, an interaction partner of  $\beta$ -catenin, binds to the TATA box binding protein. *Proc. Nat. Acad. Sci. USA* **95**, 14787-14792.
- Behrens, J., von Kries, J., Kuhl, M., Bruhn, L., Wedlich, D., Grosschedl, R. and Birchmeier, W. (1996). Functional interaction of  $\beta$ -catenin with the transcription factor LEF-1. *Nature* **382**, 638-642.
- Behrens, J., Jerchow, B., Wurtele, M., Grimm, J., Asbrand, C., Wirtz, R., Kuhl, M., Wedlich, D. and Birchmeier, W. (1998). Functional interaction of an axin homolog, conductin, with  $\beta$ -catenin, APC, and GSK3 $\beta$ . *Science* **280**, 596-599.
- Behrens, J. (1999). Cadherins and catenins: role in signal transduction and tumor progression. *Cancer Metast. Rev.* **18**, 15-30.
- Ben-Ze'ev, A. (1997). Cytoskeleton and adhesion proteins as tumor suppressors. *Curr. Opin. Cell Biol.* **9**, 99-108.
- Ben-Ze'ev, A. and Geiger, B. (1998). Differential molecular interactions of  $\beta$ -catenin and plakoglobin in adhesion, signaling and cancer. *Curr. Opin. Cell Biol.* **10**, 629-639.
- Ben-Ze'ev, A. (1999). Focal adhesions and adherens junctions: their role in tumorigenesis. *Advan. Mol. Cell Biol.* **28**, 135-163.
- Bierkamp, C., McLaughlin, K., Schwarz, H., Huber, O. and Kemler, R. (1996). Embryonic heart and skin defects in mice lacking plakoglobin. *Dev. Biol.* **180**, 780-785.
- Bierkamp, C., Schwarz, H., Huber, O. and Kemler, R. (1999). Desmosomal localization of  $\beta$ -catenin in the skin of plakoglobin null-mutant mice. *Development* **126**, 371-381.
- Bradley, R., Cowin, P. and Brown, A. (1993). Expression of Wnt-1 in PC12 cells results in modulation of plakoglobin and E-cadherin and increased cellular adhesion. *J. Cell Biol.* **123**, 1857-1865.
- Brannon, M., Brown, J., Bates, R., Kimelman, D. and Moon, R. (1999). XctBP is a XTcf-3 co-repressor with roles throughout Xenopus development. *Development* **126**, 3159-3170.
- Brunner, E., Peter, O., Schweizer, L. and Basler, K. (1997). Pangolin encodes a Lef-1 homologue that acts downstream of Armadillo to transduce the Wingless signal in Drosophila. *Nature* **385**, 829-833.
- Bullions, L. and Levine, A. (1998). The role of  $\beta$ -catenin in cell adhesion, signal transduction, and cancer. *Curr. Opin. Oncol.* **10**, 81-87.
- Butz, S., Stappert, J., Weissig, H. and Kemler, R. (1992). Plakoglobin and  $\beta$ -catenin: distinct but closely related. *Science* **257**, 1142-1144.
- Caca, K., Kolligs, F., Ji, X., Hayes, M., Qian, J., Yahanda, A., Rimm, D., Costa, J. and Fearon, E. (1999).  $\beta$ - and  $\gamma$ -catenin mutations, but not E-cadherin inactivation, underlie T-cell factor/lymphoid enhancer factor transcriptional deregulation in gastric and pancreatic cancer. *Cell Growth Differ.* **10**, 369-376.
- Charpentier, E., Lavker, R., Acquista, E. and Cowin, P. (2000). Plakoglobin

- suppresses epithelial proliferation and hair growth in vivo. *J. Cell Biol.* **149**, 503-520.
- Chitaev, N., Leube, R., Troyanovsky, R., Eshkind, L., Franke, W. and Troyanovsky, S. (1996). The binding of plakoglobin to desmosomal cadherins: patterns of binding sites and topogenic potential. *J. Cell Biol.* **133**, 359-369.
- Chitaev, N., Averbakh, A., Troyanovsky, R. and Troyanovsky, S. (1998). Molecular organization of the desmoglein-plakoglobin complex. *J. Cell Sci.* **111**, 1941-1949.
- Cowin, P., Kapprell, H., Franke, W., Tamkun, J. and Hynes, O. (1986). Plakoglobin: a protein common to different kinds of intercellular adhering junctions. *Cell* **46**, 1063-1073.
- Cowin, P. and Burke, B. (1996). Cytoskeleton-membrane interactions. *Curr. Opin. Cell Biol.* **8**, 56-65.
- Cox, R., Pai, L., Kirkpatrick, C., Stein, J. and Peifer, M. (1999a). Roles of the C terminus of armadillo in wingless signaling in *Drosophila*. *Genetics* **153**, 319-332.
- Cox, R., Pai, L., Miller, J., Orsulic, S., Stein, J., McCormick, C., Audeh, Y., Wang, W., Moon, R. and Peifer, M. (1999b). Membrane-tethered *Drosophila* Armadillo cannot transduce Wingless signal on its own. *Development* **126**, 1327-1335.
- Crawford, H., Fingleton, B., Rudolph-Owen, L., Goss, K., Rubinfeld, B., Polakis, P. and Matrisian, L. (1999). The metalloproteinase matrilysin is a target of  $\beta$ -catenin transactivation in intestinal tumors. *Oncogene* **18**, 2883-2891.
- Dobrosotskaya, I. and James, G. (2000). MAGI-1 interacts with beta-catenin and is associated with cell-cell adhesion structures. *Biochem. Biophys. Res. Commun.* **270**, 903-909.
- Eastman, Q. and Grosschedl, R. (1999). Regulation of LEF-1/TCF transcription factors by Wnt and other signals. *Curr. Opin. Cell Biol.* **11**, 233-240.
- Easwaran, V., Pishvaian, M., Salimuddin and Byers, S. (1999). Cross-regulation of  $\beta$ -catenin-LEF/TCF and retinoid signaling pathways. *Curr. Biol.* **9**, 1415-1418.
- Eger, A., Stockinger, A., Schaffhauser, B., Beug, H. and Foisner, R. (2000). Epithelial mesenchymal transition by c-Fos estrogen receptor activation involves nuclear translocation of  $\beta$ -catenin and upregulation of  $\beta$ -catenin/lymphoid enhancer binding factor-1 transcriptional activity. *J. Cell Biol.* **148**, 173-188.
- Espada, J., Perez-Moreno, M., Braga, V., Rodriguez-Viciano, P. and Cano, A. (1999). H-Ras activation promotes cytoplasmic accumulation and phosphoinositide 3-OH kinase association of  $\beta$ -catenin in epidermal keratinocytes. *J. Cell Biol.* **146**, 967-980.
- Fagotto, F., Funayama, N., Gluck, U. and Gumbiner, B. (1996). Binding to cadherins antagonizes the signaling activity of  $\beta$ -catenin during axis formation in *Xenopus*. *J. Cell Biol.* **132**, 1105-1114.
- Fagotto, F., Gluck, U. and Gumbiner, B. (1998). Nuclear localization signal-independent and importin/karyopherin-independent nuclear import of  $\beta$ -catenin. *Curr. Biol.* **8**, 181-190.
- Farr, G., Ferkey, D., Yost, C., Pierce, S., Weaver, C. and Kimelman, D. (2000). Interaction among GSK-3, GBP, axin and APC in *Xenopus* axis specification. *J. Cell Biol.* **148**, 691-702.
- Fukata, M., Kuroda, S., Nakagawa, M., Kawajiri, A., Itoh, N., Shoji, I., Matsuura, Y., Yonehara, S., Fujisawa, H., Kikuchi, A. and Kaibuchi, K. (1999). Cdc42 and Rac1 regulate the interaction of IQGAP1 with beta-catenin. *J. Biol. Chem.* **274**, 26044-26050.
- Funayama, N., Fagotto, F., McCrea, P. and Gumbiner, B. (1995). Embryonic axis induction by the armadillo repeat domain of  $\beta$ -catenin: evidence for intracellular signaling. *J. Cell Biol.* **128**, 959-968.
- Galbiati, F., Volonte, D., Brown, A., Weinstein, D., Ben-Ze'ev, A., Pestell, R. and Lisanti, M. (2000). Caveolin-1 expression inhibits Wnt/beta-catenin/LeF-1 signaling by recruiting beta-catenin to caveolae membrane domains. *J. Biol. Chem.* (in press).
- Gat, U., DasGupta, R., Degenstein, L. and Fuchs, E. (1998). De novo hair follicle morphogenesis and hair tumors in mice expressing a truncated  $\beta$ -catenin in skin. *Cell* **95**, 605-614.
- Gumbiner, B. (1996). Cell adhesion: the molecular basis of tissue architecture and morphogenesis. *Cell* **84**, 345-357.
- Gumbiner, B. (1997). Carcinogenesis: a balance between  $\beta$ -catenin and APC. *Curr. Biol.* **7**, R443-446.
- Haegel, H., Larue, L., Ohsugi, M., Fedorov, L., Herrenknecht, K. and Kemler, R. (1995). Lack of  $\beta$ -catenin affects mouse development at gastrulation. *Development* **121**, 3529-3537.
- Hamaguchi, M., Matsuyoshi, N., Ohnishi, Y., Gotoh, B., Takeichi, M. and Nagai, Y. (1993). p60v-src causes tyrosine phosphorylation and inactivation of the N-cadherin-catenin cell adhesion system. *EMBO J.* **12**, 307-314.
- Hart, M., Concordet, J., Lassot, I., Albert, I., del los Santos, R., Durand, H., Perret, C., Rubinfeld, B., Margottin, F., Benarous, R. et al. (1999). The F-box protein  $\beta$ -TrCP associates with phosphorylated  $\beta$ -catenin and regulates its activity in the cell. *Curr. Biol.* **9**, 207-210.
- Hatzfeld, M. (1999). The armadillo family of structural proteins. *Int. Rev. Cytol.* **186**, 179-224.
- He, T., Sparks, A., Rago, C., Hermeking, H., Zawel, L., da Costa, L., Morin, P., Vogelstein, B. and Kinzler, K. (1998). Identification of c-MYC as a target of the APC pathway. *Science* **281**, 1509-1512.
- He, T., Chan, T., Vogelstein, B. and Kinzler, K. (1999). PPAR $\delta$  is an APC-regulated target of nonsteroidal anti-inflammatory drugs. *Cell* **99**, 335-345.
- Heasman, J., Crawford, A., Goldstone, K., Garner-Hamrick, P., Gumbiner, B., McCrea, P., Kintner, C., Noro, C. and Wylie, C. (1994). Overexpression of cadherins and underexpression of  $\beta$ -catenin inhibit dorsal mesoderm induction in early *Xenopus* embryos. *Cell* **79**, 791-803.
- Hecht, A., Litterst, C., Huber, O. and Kemler, R. (1999). Functional characterization of multiple transactivating elements in  $\beta$ -catenin, some of which interact with the TATA-binding protein in vitro. *J. Biol. Chem.* **274**, 18017-18025.
- Hecht, A., Vleminckx, K., Stemmler, M., van Roy, F. and Kemler, R. (2000). The p300/CBP acetyltransferases function as transcriptional coactivators of  $\beta$ -catenin in vertebrates. *EMBO J.* **19**, 1839-1850.
- Heisenberg, C., Tada, M., Rauch, G., Saude, L., Concha, M., Geisler, R., Stemple, D., Smith, J. and Wilson, S. (2000). Silberblick/Wnt11 mediates convergent extension movements during zebrafish gastrulation. *Nature* **405**, 76-81.
- Hinck, L., Nelson, W. and Papkoff, J. (1994). Wnt-1 modulates cell-cell adhesion in mammalian cells by stabilizing  $\beta$ -catenin binding to the cell adhesion protein cadherin. *J. Cell Biol.* **124**, 729-741.
- Hoschuetzky, H., Aberle, H. and Kemler, R. (1994).  $\beta$ -catenin mediates the interaction of the cadherin-catenin complex with epidermal growth factor receptor. *J. Cell Biol.* **127**, 1375-1380.
- Hsu, S., Galceran, J. and Grosschedl, R. (1998). Modulation of transcriptional regulation by LEF-1 in response to Wnt-1 signaling and association with  $\beta$ -catenin. *Mol. Cell Biol.* **18**, 4807-4818.
- Huber, O., Korn, R., McLaughlin, J., Ohsugi, M., Herrmann, B. and Kemler, R. (1996). Nuclear localization of  $\beta$ -catenin by interaction with transcription factor LEF-1. *Mech. Dev.* **59**, 3-10.
- Huber, A., Nelson, W. and Weis, W. (1997). Three-dimensional structure of the armadillo repeat region of  $\beta$ -catenin. *Cell* **90**, 871-882.
- Hulsken, J., Birchmeier, W. and Behrens, J. (1994). E-cadherin and APC compete for the interaction with  $\beta$ -catenin and the cytoskeleton. *J. Cell Biol.* **127**, 2061-2069.
- Huelsken, J., Vogel, R., Brinkmann, V., Erdmann, B., Birchmeier, C. and Birchmeier, W. (2000). Requirement for  $\beta$ -catenin in anterior-posterior axis formation in mice. *J. Cell Biol.* **148**, 567-578.
- Ikeda, S., Kishida, S., Yamamoto, H., Murai, H., Koyama, S. and Kikuchi, A. (1998). Axin, a negative regulator of the Wnt signaling pathway, forms a complex with GSK-3 $\beta$  and  $\beta$ -catenin and promotes GSK-3 $\beta$ -dependent phosphorylation of  $\beta$ -catenin. *EMBO J.* **17**, 1371-1384.
- Ishitani, T., Ninomiya-Tsuji, J., Nagai, S., Nishita, M., Meneghini, M., Barker, N., Waterman, M., Bowerman, B., Clevers, H., Shibuya, H. et al. (1999). The TAK1-NLK-MAPK-related pathway antagonizes signalling between  $\beta$ -catenin and transcription factor TCF. *Nature* **399**, 798-802.
- Itoh, K., Antipova, A., Ratcliffe, M. and Sokol, S. (2000). Interaction of dishevelled and *Xenopus* axin-related protein is required for wnt signal transduction. *Mol. Cell Biol.* **20**, 2228-2238.
- Jho, E., Lomvardas, S. and Costantini, F. (1999). A GSK3 $\beta$  phosphorylation site in axin modulates interaction with  $\beta$ -catenin and Tcf-mediated gene expression. *Biochem. Biophys. Res. Commun.* **266**, 28-35.
- Jiang, J. and Struhl, G. (1998). Regulation of the Hedgehog and Wingless signalling pathways by the F-box/WD40-repeat protein Slimb. *Nature* **391**, 493-496.
- Kang, D., Soriano, S., Frosch, M., Collins, T., Naruse, S., Sisodia, S., Leibowitz, G., Levine, F. and Koo, E. (1999). Presenilin 1 facilitates the constitutive turnover of  $\beta$ -catenin: differential activity of Alzheimer's disease-linked PS1 mutants in the  $\beta$ -catenin-signaling pathway. *J. Neurosci.* **19**, 4229-4237.
- Karnovsky, A. and Klymkowsky, M. (1995). Anterior axis duplication in *Xenopus* induced by the over-expression of the cadherin-binding protein plakoglobin. *Proc. Nat. Acad. Sci. USA* **92**, 4522-4526.

- Kemler, R. (1993). From cadherins to catenins: cytoplasmic protein interactions and regulation of cell adhesion. *Trends Genet.* **9**, 317-321.
- Kikuchi, A. (2000). Regulation of  $\beta$ -catenin signaling in the Wnt pathway. *Biochem. Biophys. Res. Commun.* **268**, 243-248.
- Kinch, M., Clark, G., Der, C. and Burridge, K. (1995). Tyrosine phosphorylation regulates the adhesions of ras-transformed breast epithelia. *J. Cell Biol.* **130**, 461-471.
- Kishida, S., Yamamoto, H., Ikeda, S., Kishida, M., Sakamoto, I., Koyama, S. and Kikuchi, A. (1998). Axin, a negative regulator of the wnt signaling pathway, directly interacts with adenomatous polyposis coli and regulates the stabilization of  $\beta$ -catenin. *J. Biol. Chem.* **273**, 10823-10826.
- Kishida, S., Yamamoto, H., Hino, S., Ikeda, S., Kishida, M. and Kikuchi, A. (1999). DIX domains of Dvl and axin are necessary for protein interactions and their ability to regulate  $\beta$ -catenin stability. *Mol. Cell. Biol.* **19**, 4414-4422.
- Kitagawa, M., Hatakeyama, S., Shirane, M., Matsumoto, M., Ishida, N., Hattori, K., Nakamichi, I., Kikuchi, A., Nakayama, K. and Nakayama, K. (1999). An F-box protein, FWD1, mediates ubiquitin-dependent proteolysis of  $\beta$ -catenin. *EMBO J.* **18**, 2401-2410.
- Klymkowsky, M., Williams, B., Barish, G., Varmus, H. and Vourgourakis, Y. (1999). Membrane-anchored plakoglobins have multiple mechanisms of action in Wnt signaling. *Mol. Biol. Cell* **10**, 3151-3169.
- Knudsen, K., Soler, A., Johnson, K. and Wheelock, M. (1995). Interaction of  $\alpha$ -catenin with the cadherin/catenin cell-cell adhesion complex via  $\alpha$ -catenin. *J. Cell Biol.* **130**, 67-77.
- Kodama, S., Ikeda, S., Asahara, T., Kishida, M. and Kikuchi, A. (1999). Axin directly interacts with plakoglobin and regulates its stability. *J. Biol. Chem.* **274**, 27682-27688.
- Kofron, M., Spagnuolo, A., Klymkowsky, M., Wylie, C. and Heasman, J. (1997). The roles of maternal  $\alpha$ -catenin and plakoglobin in the early Xenopus embryo. *Development* **124**, 1553-1560.
- Kolligs, F., Hu, G., Dang, C. and Fearon, E. (1999). Neoplastic transformation of RK3E by mutant  $\beta$ -catenin requires deregulation of Tcf/Lef transcription but not activation of c-myc expression. *Mol. Cell. Biol.* **19**, 5696-5706.
- Kolligs, F., Kolligs, B., Hajra, K., Hu, G., Tani, M., Cho, K. and Fearon, E. (2000).  $\gamma$ -catenin is regulated by the APC tumor suppressor and its oncogenic activity is distinct from that of  $\beta$ -catenin. *Genes Dev.* **14**, 1319-1331.
- Korinek, V., Barker, N., Morin, P., van Wichen, D., de Weger, R., Kinzler, K., Vogelstein, B. and Clevers, H. (1997). Constitutive transcriptional activation by a  $\beta$ -catenin-Tcf complex in APC-/- colon carcinoma. *Science* **275**, 1784-1787.
- Kowalczyk, A., Bornslaeger, E., Borgwardt, J., Palka, H., Dhaliwal, A., Corcoran, C., Denning, M. and Green, K. (1997). The amino-terminal domain of desmoplakin binds to plakoglobin and clusters desmosomal cadherin-plakoglobin complexes. *J. Cell Biol.* **139**, 773-784.
- Kuroda, S., Fukata, M., Nakagawa, M., Fujii, K., Nakamura, T., Ookubo, T., Izawa, I., Nagase, T., Nomura, N., Tani, H. et al. (1998). Role of IQGAP1, a target of the small GTPases Cdc42 and Rac1, in regulation of E-cadherin-mediated cell-cell adhesion. *Science* **281**, 832-835.
- Kwon, Y., Gupta, A., Zhou, Y., Nikolic, M. and Tsai, L. (2000). Regulation of N-cadherin-mediated adhesion by the p35-Cdk5 kinase. *Curr. Biol.* **10**, 363-372.
- Latres, E., Chiaur, D. and Pagano, M. (1999). The human F box protein  $\beta$ -TrCP associates with the Cul1/Skp1 complex and regulates the stability of  $\beta$ -catenin. *Oncogene* **18**, 849-854.
- Lee, J., Ishimoto, A. and Yanagawa, S. (1999). Characterization of mouse dishevelled (Dvl) proteins in Wnt/Wingless signaling pathway. *J. Biol. Chem.* **274**, 21464-21470.
- Levanon, D., Goldstein, R., Bernstein, Y., Tang, H., Goldenberg, D., Stifani, S., Paroush, Z. and Groner, Y. (1998). Transcriptional repression by AML1 and LEF-1 is mediated by the TLE/Groucho corepressors. *Proc. Nat. Acad. Sci. USA* **95**, 11590-11595.
- Lewis, J., Wahl, J. r., Sass, K., Jensen, P., Johnson, K. and Wheelock, M. (1997). Cross-talk between adherens junctions and desmosomes depends on plakoglobin. *J. Cell Biol.* **136**, 919-934.
- Li, L., Yuan, H., Weaver, C., Mao, J., Farr, G., Sussman, D., Jonkers, J., Kimelman, D. and Wu, D. (1999). Axin and fratl interact with dvl and GSK, bridging dvl to GSK in wnt-mediated regulation of LEF-1. *EMBO J.* **18**, 4233-4240.
- Lickert, H., Bauer, A., Kemler, R. and Stappert, J. (2000). Casein kinase II phosphorylation of E-cadherin increases E-cadherin/ $\beta$ -catenin interaction and strengthens cell-cell adhesion. *J. Biol. Chem.* **275**, 5090-5095.
- Liu, C., Kato, Y., Zhang, Z., Do, V., Yankner, B. and He, X. (1999).  $\beta$ -TrCP couples  $\beta$ -catenin phosphorylation-degradation and regulates Xenopus axis formation.
- Matsuyoshi, N., Hamaguchi, M., Taniguchi, S., Nagafuchi, A., Tsukita, S. and Takeichi, M. (1992). Cadherin-mediated cell-cell adhesion is perturbed by v-src tyrosine phosphorylation in metastatic fibroblasts. *J. Cell Biol.* **118**, 703-714.
- McCrea, P., Turck, C. and Gumbiner, B. (1991). A homolog of the armadillo protein in Drosophila (plakoglobin) associated with E-cadherin. *Science* **254**, 1359-1361.
- Millar, S., Willert, K., Salinas, P., Roelink, H., Nusse, R., Sussman, D. and Barsh, G. (1999). WNT signaling in the control of hair growth and structure. *Dev. Biol.* **207**, 133-149.
- Miller, J., Hocking, A., Brown, J. and Moon, R. (1999). Mechanism and function of signal transduction by the Wnt/ $\beta$ -catenin and Wnt/ $\text{Ca}^{2+}$  pathways. *Oncogene* **18**, 7860-7872.
- Miller, J. and Moon, R. (1997). Analysis of the signaling activities of localization mutants of  $\beta$ -catenin during axis specification in Xenopus. *J. Cell Biol.* **139**, 229-243.
- Molenaar, M., van de Wetering, M., Oosterwegel, M., Peterson-Maduro, J., Godsave, S., Korinek, V., Roose, J., Destree, O. and Clevers, H. (1996). XTcf-3 transcription factor mediates  $\beta$ -catenin-induced axis formation in Xenopus embryos. *Cell* **86**, 391-399.
- Morin, P. (1999).  $\beta$ -catenin signaling and cancer. *BioEssays* **21**, 1021-1030.
- Morin, P., Sparks, A., Korinek, V., Barker, N., Clevers, H., Vogelstein, B. and Kinzler, K. (1997). Activation of  $\beta$ -catenin-Tcf signaling in colon cancer by mutations in  $\beta$ -catenin or APC. *Science* **275**, 1787-1790.
- Muller, T., Choidas, A., Reichmann, E. and Ullrich, A. (1999). Phosphorylation and free pool of  $\beta$ -catenin are regulated by tyrosine kinases and tyrosine phosphatases during epithelial cell migration. *J. Biol. Chem.* **274**, 10173-10183.
- Murayama, M., Tanaka, S., Palacino, J., Murayama, O., Honda, T., Sun, X., Yasutake, K., Nihonmatsu, N., Wolozin, B. and Takashima, A. (1998). Direct association of presenilin-1 with  $\beta$ -catenin. *FEBS Lett.* **433**, 73-77.
- Nagafuchi, A., Ishihara, S. and Tsukita, S. (1994). The roles of catenins in the cadherin-mediated cell adhesion: functional analysis of E-cadherin-  $\alpha$ -catenin fusion molecules. *J. Cell Biol.* **127**, 235-245.
- Nishimura, M., Yu, G., Levesque, G., Zhang, D., Ruel, L., Chen, F., Milman, P., Holmes, E., Liang, Y., Kawarai, T. et al. (1999). Presenilin mutations associated with Alzheimer disease cause defective intracellular trafficking of  $\beta$ -catenin, a component of the presenilin protein complex. *Nature Med.* **5**, 164-169.
- Nishita, M., Hashimoto, M., Ogata, S., Laurent, M., Ueno, N., Shibuya, H. and Cho, K. (2000) Interaction between Wnt and TGF- $\beta$  signalling pathways during formation of Spemann's organizer. *Nature* **6771**, 781-785.
- Noordermeer, J., Klingensmith, J., Perrimon, N. and Nusse, R. (1994). Dishevelled and armadillo act in the wingless signalling pathway in Drosophila. *Nature* **367**, 80-83.
- Nusse, R. (1999). WNT targets: repression and activation. *Trends Genet.* **15**, 1-3.
- Omer, C., Miller, P., Diehl, R. and Kral, A. (1999). Identification of Tcf4 residues involved in high-affinity  $\beta$ -catenin binding. *Biochem. Biophys. Res. Commun.* **256**, 584-590.
- Orford, K., Crockett, C., Jensen, J., Weissman, A. and Byers, S. (1997). Serine phosphorylation-regulated ubiquitination and degradation of  $\beta$ -catenin. *J. Biol. Chem.* **272**, 24735-24738.
- Orford, K., Orford, C. and Byers, S. (1999). Exogenous expression of  $\beta$ -catenin regulates contact inhibition, anchorage-independent growth, anoikis, and radiation-induced cell cycle arrest. *J. Cell Biol.* **146**, 855-868.
- Orsulic, S., Huber, O., Aberle, H., Arnold, S. and Kemler, R. (1999). E-cadherin binding prevents  $\beta$ -catenin nuclear localization and  $\beta$ -catenin/LEF-1-mediated transactivation. *J. Cell Sci.* **112**, 1237-1245.
- Ozawa, M., Baribault, H. and Kemler, R. (1989). The cytoplasmic domain of the cell adhesion molecule uvomorulin associates with three independent proteins structurally related in different species. *EMBO J.* **8**, 1711-1717.
- Palka, H. and Green, K. (1997). Roles of plakoglobin end domains in desmosome assembly. *J. Cell Sci.* **110**, 2359-2371.
- Papkoff, J., Rubinfeld, B., Schryver, B. and Polakis, P. (1996). Wnt-1 regulates free pools of catenins and stabilizes APC-catenin complexes. *Mol. Cell. Biol.* **16**, 2128-2134.
- Peifer, M. (1997).  $\beta$ -catenin as oncogene: the smoking gun. *Science* **275**, 1752-1753.



- Peifer, M. and Polakis, P. (2000). Wnt signaling in oncogenesis and embryogenesis – a look outside the nucleus. *Science* **287**, 1606-1609.
- Polakis, P. (1999). The oncogenic activation of  $\beta$ -catenin. *Curr. Opin. Genet. Dev.* **9**, 15-21.
- Prieve, M. and Waterman, M. (1999). Nuclear localization and formation of  $\beta$ -catenin-lymphoid enhancer factor 1 complexes are not sufficient for activation of gene expression. *Mol. Cell. Biol.* **19**, 4503-4515.
- Riese, J., Yu, X., Munnerlyn, A., Eresh, S., Hsu, S., Grosschedl, R. and Bienz, M. (1997). LEF-1, a nuclear factor coordinating signaling inputs from wingless and decapentaplegic. *Cell* **88**, 777-787.
- Roose, J. and Clevers, H. (1999). TCF transcription factors: molecular switches in carcinogenesis. *Biochim. Biophys. Acta* **1424**, M23-37.
- Roose, J., Huls, G., van Beest, M., Moerer, P., van der Horn, K., Goldschmeding, R., Logtenberg, T. and Clevers, H. (1999). Synergy between tumor suppressor APC and the  $\beta$ -catenin-Tcf4 target Tcf1. *Science* **285**, 1923-1926.
- Roose, J., Molenaar, M., Peterson, J., Hurenkamp, J., Brantjes, H., Moerer, P., van de Wetering, M., Destree, O. and Clevers, H. (1998). The Xenopus Wnt effector XTcf-3 interacts with Groucho-related transcriptional repressors. *Nature* **395**, 608-612.
- Roura, S., Miravet, S., Piedra, J., Garcia de Herreros, A. and Dunach, M. (1999). Regulation of E-cadherin/Catenin association by tyrosine phosphorylation. *J. Biol. Chem.* **274**, 36734-36740.
- Rubinfeld, B., Albert, I., Porfiri, E., Fiol, C., Munemitsu, S. and Polakis, P. (1996). Binding of GSK3 $\beta$  to the APC/ $\beta$ -catenin complex and regulation of complex assembly. *Science* **272**, 1023-1026.
- Rubinfeld, B., Souza, B., Albert, I., Muller, O., Chamberlain, S., Masiarz, F., Munemitsu, S. and Polakis, P. (1993). Association of the APC gene product with  $\beta$ -catenin. *Science* **262**, 1731-1734.
- Rubinfeld, B., Souza, B., Albert, I., Munemitsu, S. and Polakis, P. (1995). The APC protein and E-cadherin form similar but independent complexes with  $\alpha$ -catenin,  $\beta$ -catenin, and plakoglobin. *J. Biol. Chem.* **270**, 5549-5555.
- Ruiz, P., Brinkmann, V., Ledermann, B., Behrend, M., Grund, C., Thalhammer, C., Vogel, F., Birchmeier, C., Gunthert, U., Franke, W. et al. (1996). Targeted mutation of plakoglobin in mice reveals essential functions of desmosomes in the embryonic heart. *J. Cell Biol.* **135**, 215-225.
- Sadot, E., Simcha, I., Iwai, K., Ciechanover, A., Geiger, B. and Ben-Ze'ev, A. (2000). Differential interaction of plakoglobin and  $\beta$ -catenin with the ubiquitin-proteasome system. *Oncogene* **19**, 1992-2001.
- Sadot, E., Simcha, I., Shtutman, M., Ben-Ze'ev, A. and Geiger, B. (1998). Inhibition of  $\beta$ -catenin-mediated transactivation by cadherin derivatives. *Proc. Nat. Acad. Sci. USA* **95**, 15339-15344.
- Salic, A., Lee, E., Mayer, L. and Kirschner, M. (2000). Control of  $\beta$ -catenin stability: reconstitution of the cytoplasmic steps of the wnt pathway in Xenopus egg extracts. *Mol. Cell* **5**, 523-532.
- Salomon, D., Sacco, P., Roy, S., Simcha, I., Johnson, K., Wheelock, M. and Ben-Ze'ev, A. (1997). Regulation of  $\beta$ -catenin levels and localization by overexpression of plakoglobin and inhibition of the ubiquitin-proteasome system. *J. Cell Biol.* **139**, 1325-1335.
- Sanson, B., White, P. and Vincent, J. (1996). Uncoupling cadherin-based adhesion from wingless signalling in Drosophila. *Nature* **383**, 627-630.
- Satoh, S., Daigo, Y., Furukawa, Y., Kato, T., Miwa, N., Nishiwiaki, T., Kawasoe, T., Ishiguro, H., Fujita, M., Tokino, T. et al. (2000). AXIN1 mutations in hepatocellular carcinomas, and growth suppression in cancer cells by virus-mediated transfer of AXIN1. *Nature Genet.* **24**, 245-250.
- Schmidt, A., Heid, H., Schafer, S., Nuber, U., Zimbelmann, R. and Franke, W. (1994). Desmosomes and cytoskeletal architecture in epithelial differentiation: cell type-specific plaque components and intermediate filament anchorage. *Eur. J. Cell Biol.* **65**, 229-245.
- Seidensticker, M. and Behrens, J. (2000). Biochemical interactions in the wnt pathway. *Biochim. Biophys. Acta* **1495**, 168-182.
- Shibamoto, S., Higano, K., Takada, R., Ito, F., Takeichi, M. and Takada, S. (1998). Cytoskeletal reorganization by soluble Wnt-3a protein signalling. *Genes Cells* **3**, 659-670.
- Shibata, T., Gotoh, M., Ochiai, A. and Hirohashi, S. (1994). Association of plakoglobin with APC, a tumor suppressor gene product, and its regulation by tyrosine phosphorylation. *Biochem. Biophys. Res. Commun.* **203**, 519-522.
- Shtutman, M., Zhurinsky, J., Simcha, I., Albanese, C., D'Amico, M., Pestell, R. and Ben-Ze'ev, A. (1999). The cyclin D1 gene is a target of the  $\beta$ -catenin/LEF-1 pathway. *Proc. Nat. Acad. Sci. USA* **96**, 5522-5527.
- Simcha, I., Geiger, B., Yehuda-Levenberg, S., Salomon, D. and Ben-Ze'ev, A. (1996). Suppression of tumorigenicity by plakoglobin: an augmenting effect of N-cadherin. *J. Cell Biol.* **133**, 199-209.
- Simcha, I., Shtutman, M., Salomon, D., Zhurinsky, J., Sadot, E., Geiger, B. and Ben-Ze'ev, A. (1998). Differential nuclear translocation and transactivation potential of  $\beta$ -catenin and plakoglobin. *J. Cell Biol.* **141**, 1433-1448.
- Smalley, M., Sara, E., Paterson, H., Naylor, S., Cook, D., Jayatilake, H., Fryer, L., Hutchinson, L., Fry, M. and Dale, T. (1999). Interaction of axin and Dvl-2 proteins regulates Dvl-2-stimulated TCF-dependent transcription. *EMBO J.* **18**, 2823-2835.
- Smith, E. and Fuchs, E. (1998). Defining the interactions between intermediate filaments and desmosomes. *J. Cell Biol.* **141**, 1229-1241.
- Steinberg, M. and McNutt, P. (1999). Cadherins and their connections: adhesion junctions have broader functions. *Curr. Opin. Cell Biol.* **11**, 554-560.
- Strovel, E., Wu, D. and Sussman, D. (2000). Protein phosphatase 2C $\alpha$  dephosphorylates axin and activates LEF-1-dependent transcription. *J. Biol. Chem.* **275**, 2399-2403.
- Su, L., Vogelstein, B. and Kinzler, K. (1993). Association of the APC tumor suppressor protein with catenins. *Science* **262**, 1734-1737.
- Sumanas, S., Strege, P., Heasman, J. and Ekker, S. (2000). The putative Wnt receptor Xenopus frizzled-7 functions upstream of  $\beta$ -catenin in vertebrate dorsoventral mesoderm patterning. *Development* **127**, 1981-1990.
- Takahashi, K., Suzuki, K. and Tsukatani, Y. (1997). Induction of tyrosine phosphorylation and association of beta-catenin with EGF receptor upon tryptic digestion of quiescent cells at confluence. *Oncogene* **15**, 71-78.
- Takashima, A., Murayama, M., Murayama, O., Kohno, T., Honda, T., Yasutake, K., Nihonmatsu, N., Mercken, M., Yamaguchi, H., Sugihara, S. et al. (1998). Presenilin 1 associates with glycogen synthase kinase-3 $\beta$  and its substrate tau. *Proc. Nat. Acad. Sci. USA* **95**, 9637-9641.
- Takemaru, K. and Moon, R. (2000). The transcriptional coactivator CBP interacts with  $\beta$ -catenin to activate gene expression. *J. Cell Biol.* **149**, 249-254.
- Tao, Y., Edwards, R., Tubb, B., Wang, S., Bryan, J. and McCrea, P. (1996). beta-Catenin associates with the actin-bundling protein fascin in a noncadherin complex. *J. Cell Biol.* **134**, 1271-1281.
- Taya, S., Yamamoto, T., Kanai-Azuma, M., Wood, S. and Kaibuchi, K. (1999). The deubiquitinating enzyme Fam interacts with and stabilizes beta-catenin. *Genes Cells* **4**, 757-767.
- Tetsu, O. and McCormick, F. (1999).  $\beta$ -catenin regulates expression of cyclin D1 in colon carcinoma cells. *Nature* **398**, 422-426.
- Thorpe, C., Schlesinger, A. and Bowerman, B. (2000). Wnt signalling in Caenorhabditis elegans: regulating repressors and polarizing the cytoskeleton. *Trends Cell Biol.* **10**, 10-17.
- Trojanovsky, S., Trojanovsky, R., Eshkind, L., Krutovskikh, V., Leube, R. and Franke, W. (1994a). Identification of the plakoglobin-binding domain in desmoglein and its role in plaque assembly and intermediate filament anchorage. *J. Cell Biol.* **127**, 151-160.
- Trojanovsky, S., Trojanovsky, R., Eshkind, L., Leube, R. and Franke, W. (1994b). Identification of amino acid sequence motifs in desmocollin, a desmosomal glycoprotein, that are required for plakoglobin binding and plaque formation. *Proc. Nat. Acad. Sci. USA* **91**, 10790-10794.
- van de Wetering, M., Cavallo, R., Dooijes, D., van Beest, M., van Es, J., Loureiro, J., Ypma, A. H., D., Jones, T., Bejsovec, A. et al. (1997). Armadillo coactivates transcription driven by the product of the Drosophila segment polarity gene dTCF. *Cell* **88**, 789-799.
- Wahl III, J., Nieset, J., Sacco-Bubulya, P., Sadler, T., Johnson, K. R. and Wheelock, M. (2000). The amino- and carboxyl-terminal tails of  $\beta$ -catenin reduce its affinity for desmoglein 2. *J. Cell Sci.* **113**, 1737-1745.
- Wallingford, J., Rowning, B., Vogeli, K., Rothbacher, U., Fraser, S. and Harland, R. (2000). Dishevelled controls cell polarity during Xenopus gastrulation. *Nature* **405**, 81-85.
- White, P., Aberle, H. and Vincent, J. (1998). Signaling and adhesion activities of mammalian  $\beta$ -catenin and plakoglobin in Drosophila. *J. Cell Biol.* **140**, 183-195.
- Willert, K., Shibamoto, S. and Nusse, R. (1999). Wnt-induced dephosphorylation of axin releases  $\beta$ -catenin from the axin complex. *Genes Dev.* **13**, 1768-1773.
- Winston, J., Strack, P., Beer-Romero, P., Chu, C., Elledge, S. and Harper, J. (1999). The SCF $\beta$ -TRCP-ubiquitin ligase complex associates specifically with phosphorylated destruction motifs in I $\kappa$ B $\alpha$  and  $\beta$ -catenin and stimulates I $\kappa$ B $\alpha$  ubiquitination in vitro. *Genes Dev.* **13**, 270-283.
- Wodarz, A. and Nusse, R. (1998). Mechanisms of Wnt signaling in development. *Annu. Rev. Cell Dev. Biol.* **14**, 59-88.
- Yamamoto, H., Kishida, S., Kishida, M., Ikeda, S., Takada, S. and Kikuchi, A. (1999). Phosphorylation of axin, a Wnt signal negative



- regulator, by glycogen synthase kinase-3 $\beta$  regulates its stability. *J. Biol. Chem.* **274**, 10681-10684.
- Yanagawa, S., Lee, J., Haruna, T., Oda, H., Uemura, T., Takeichi, M. and Ishimoto, A.** (1997). Accumulation of Armadillo induced by Wingless, Dishevelled, and dominant-negative Zeste-White 3 leads to elevated DE-cadherin in *Drosophila* clone 8 wing disc cells. *J. Biol. Chem.* **272**, 25243-25251.
- Yap, A., Brieher, W. and Gumbiner, B.** (1997). Molecular and functional analysis of cadherin-based adherens junctions. *Annu. Rev. Cell Dev. Biol.* **13**, 119-146.
- Yokoya, F., Imamoto, N., Tachibana, T. and Yoneda, Y.** (1999).  $\beta$ -catenin can be transported into the nucleus in a Ran-unassisted manner. *Mol. Biol. Cell* **10**, 1119-1131.
- Yost, C., Torres, M., Miller, J., Huang, E., Kimelman, D. and Moon, R.** (1996). The axis-inducing activity, stability, and subcellular distribution of  $\beta$ -catenin is regulated in *Xenopus* embryos by glycogen synthase kinase 3. *Genes Dev.* **10**, 1443-1454.
- Young, C., Kitamura, M., Hardy, S. and Kitajewski, J.** (1998). Wnt-1 induces growth, cytosolic  $\beta$ -catenin, and Tcf/Lef transcriptional activation in Rat-1 fibroblasts. *Mol. Cell. Biol.* **18**, 2474-2485.
- Yu, G., Chen, F., Levesque, G., Nishimura, M., Zhang, D., Levesque, L., Rogaeva, E., Xu, D., Liang, Y., Duthie, M. et al.** (1998). The presenilin 1 protein is a component of a high molecular weight intracellular complex that contains beta-catenin. *J. Biol. Chem.* **273**, 16470-16475.
- Zhang, Z., Hartmann, H., Do, V., Abramowski, D., Sturchler-Pierrat, C., Staufenbiel, M., Sommer, B., van de Wetering, M., Clevers, H., Saftig, P. et al.** (1998). Destabilization of  $\beta$ -catenin by mutations in presenilin-1 potentiates neuronal apoptosis. *Nature* **395**, 698-702.
- Zhurinsky, J., Shtutman, M. and Ben-Ze'ev, A.** (2000). Differential mechanisms of LEF/TCF-dependent transcriptional activation by  $\beta$ -catenin and plakoglobin. *Mol. Cell. Biol.* **20**, 4238-4252.
- Zorn, A., Barish, G., Williams, B., Lavender, P., Klymkowsky, M. and Varmus, H.** (1999). Regulation of Wnt signaling by Sox proteins: XSox17  $\alpha/\beta$  and XSox3 physically interact with  $\beta$ -catenin. *Mol. Cell* **4**, 487-498.
